# Supplementary material for: Differential Effects of Viruses on the Growth Efficiency of Freshwater Bacterioplankton in Eutrophic Relative to Non-Eutrophic Lakes
Source: MDPI journal article supplement (doi:10.3390/microorganisms11020384), 2023-02-02

Supplementary Figure S1. Relationship between bacterial and viral abundance in the lakes of French Massif Central.

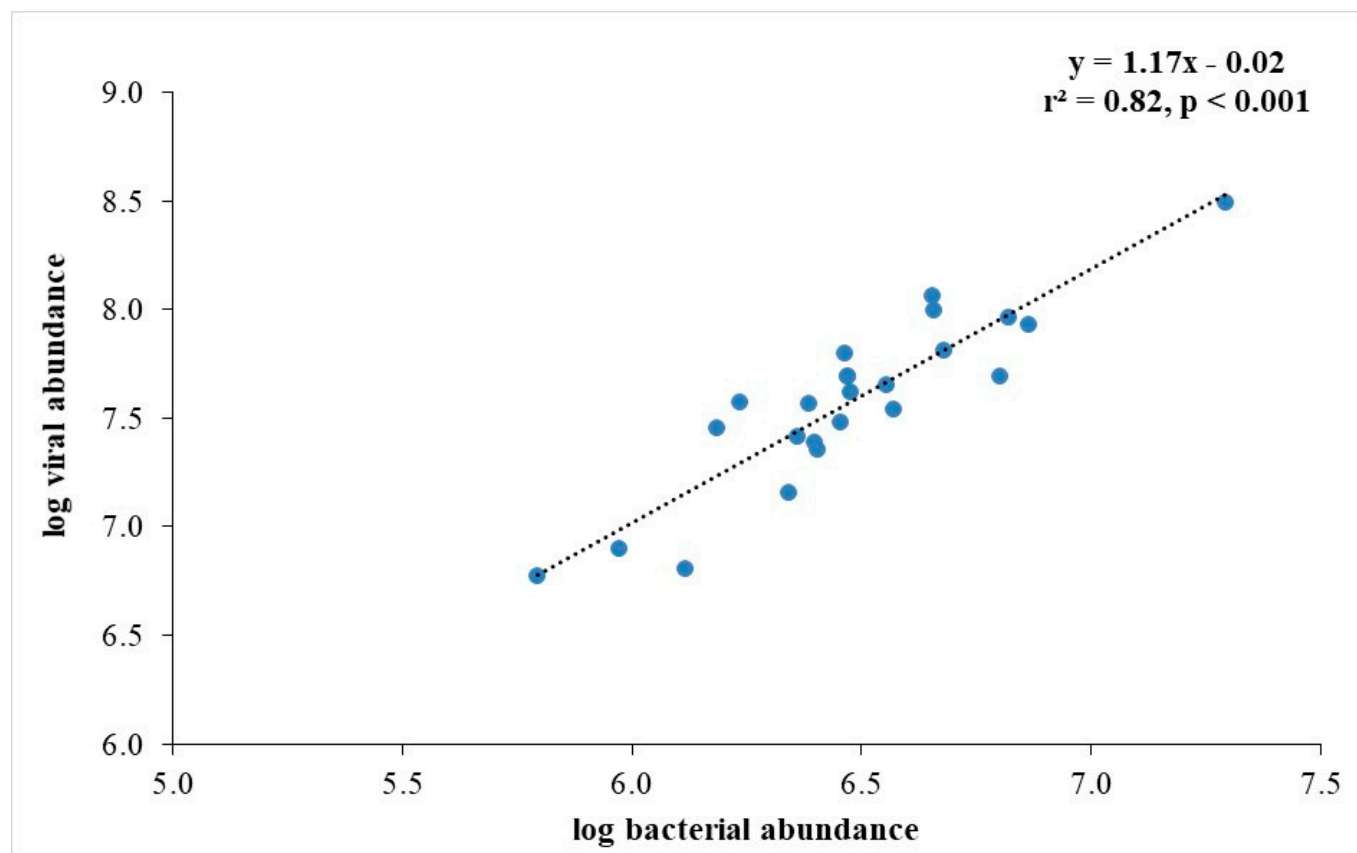

Supplement: s1 [file s1]
